# Supplementary material for: The Potential of Arctic Pseudogymnoascus Fungi in the Biosynthesis of Natural Products
Source: MDPI journal article supplement (doi:10.3390/fermentation9080702), 2023-07-26
Supplement: s1 [file s1]

## SUPPORTING INFORMATION

for

# The Potential of Arctic *Pseudogymnoascus* Fungi in the Biosynthesis of Natural Products

Tatiana V. Antipova <sup>1,\*</sup>, Kirill V. Zaitsev <sup>2,\*</sup>, Valentina P. Zhelifonova <sup>1</sup>, Sergey V. Tarlachkov <sup>1</sup>, Yuri K. Grishin <sup>2</sup>, Galina A. Kochkina <sup>1</sup> and Mikhail B. Vainshtein <sup>1</sup>

<sup>1</sup> G.K. Skryabin Institute of Biochemistry and Physiology of Microorganisms, FRC Pushchino Scientific Centre of Biological Research, Russian Academy of Sciences, 142290 Pushchino, Russia; zhelifonova@yandex.ru (V.P.Z.); sergey@tarlachkov.ru (S.V.T.); gaga56@mail.ru (G.A.K.); vain@ibpm.pushchino.ru (M.B.V.)

<sup>2</sup> Department of Chemistry, M.V. Lomonosov Moscow State University, 119991 Moscow, Russia; grishin@nmr.chem.msu.ru

\* Correspondence: tatantip@rambler.ru (T.V.A.); zaitsev@org.chem.msu.ru (K.V.Z.)

## Table of Contents

### CI mass-spectra Data for the Compounds

|                                                                                                                                        |    |
|----------------------------------------------------------------------------------------------------------------------------------------|----|
| <b>Figure S1. (a)</b> The positive ions CI mass spectrum of <b>1</b> ; <b>(b)</b> The positive ions CI mass spectrum of <b>2</b> ..... | S4 |
|----------------------------------------------------------------------------------------------------------------------------------------|----|

### NMR Spectral Data for the Compounds

|                                                                                                                                      |     |
|--------------------------------------------------------------------------------------------------------------------------------------|-----|
| <b>Table S1.</b> Data of the NMR spectra for (+)-Macrosphelide A ( <b>1</b> ).....                                                   | S5  |
| <b>Figure S2.</b> <sup>1</sup> H NMR Spectrum of (+)-Macrosphelide A ( <b>1</b> ) (CDCl <sub>3</sub> , RT).....                      | S6  |
| <b>Figure S3.</b> <sup>13</sup> C NMR Spectrum of (+)-Macrosphelide A ( <b>1</b> ) (CDCl <sub>3</sub> , RT).....                     | S7  |
| <b>Figure S4.</b> <sup>13</sup> C APT NMR Spectrum of (+)-Macrosphelide A ( <b>1</b> ) (CDCl <sub>3</sub> , RT).....                 | S8  |
| <b>Figure S5.</b> <sup>1</sup> H- <sup>1</sup> H COSY NMR Spectrum of (+)-Macrosphelide A ( <b>1</b> ) (CDCl <sub>3</sub> , RT)..... | S9  |
| <b>Figure S6.</b> HSQC NMR spectrum of (+)-Macrosphelide A ( <b>1</b> ) (CDCl <sub>3</sub> , RT).....                                | S10 |
| <b>Figure S7.</b> HMQC NMR Spectrum of (+)-Macrosphelide A ( <b>1</b> ) (CDCl <sub>3</sub> , RT).....                                | S11 |
| <b>Figure S8.</b> HMBC NMR spectrum of (+)-Macrosphelide A ( <b>1</b> ) (CDCl <sub>3</sub> , RT).....                                | S12 |
| <b>Figure S9.</b> NOESY NMR spectrum of (+)-Macrosphelide A ( <b>1</b> ) (CDCl <sub>3</sub> , RT).....                               | S13 |

|                                                                                                                      |     |
|----------------------------------------------------------------------------------------------------------------------|-----|
| <b>Table S2.</b> Data of the NMR spectra for (+)-Macrosphelide B ( <b>2</b> ).....                                   | S14 |
| <b>Figure S10.</b> $^1\text{H}$ NMR Spectrum of (+)-Macrosphelide B ( <b>2</b> ) ( $\text{CDCl}_3$ , RT).....        | S15 |
| <b>Figure S11.</b> $^{13}\text{C}$ NMR Spectrum of (+)-Macrosphelide B ( <b>2</b> ) ( $\text{CDCl}_3$ , RT).....     | S16 |
| <b>Figure S12.</b> $^{13}\text{C}$ APT NMR Spectrum of (+)-Macrosphelide B ( <b>2</b> ) ( $\text{CDCl}_3$ , RT)..... | S17 |
| <b>Figure S13.</b> HSQC NMR Spectrum of (+)-Macrosphelide B ( <b>2</b> ) ( $\text{CDCl}_3$ , RT).....                | S18 |
| <b>Figure S14.</b> HMBC NMR Spectrum of (+)-Macrosphelide B ( <b>2</b> ) ( $\text{CDCl}_3$ , RT).....                | S19 |

**Additional data on genome analysis**

|                                                                                                     |     |
|-----------------------------------------------------------------------------------------------------|-----|
| <b>Figure S15.</b> Identified secondary metabolites regions in the genome of the strain F-4518..... | S20 |
| <b>Figure S16.</b> Identified secondary metabolites regions in the genome of the strain F-4519..... | S21 |

*CI mass-spectra Data for the Compounds*

**Figure S1. (a)** The positive ions CI mass spectrum of **1**

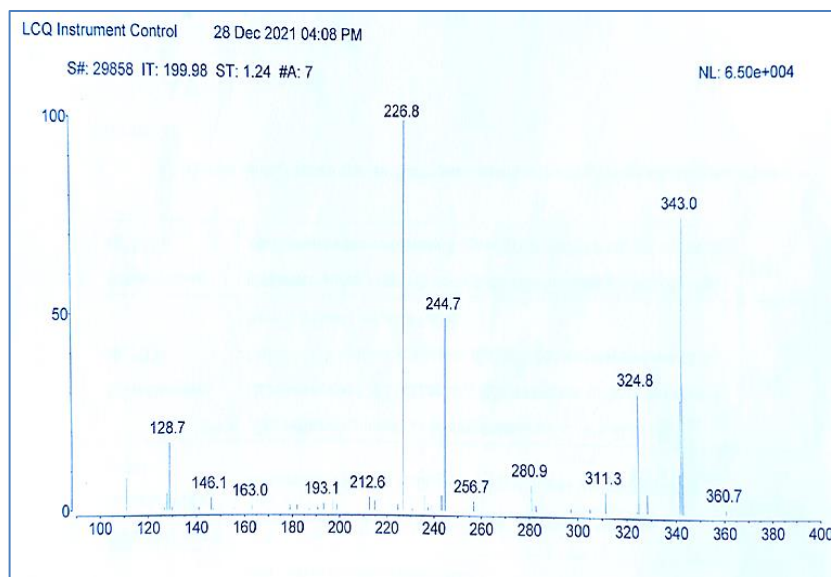

**(b)** The positive ions CI mass spectrum of **2**

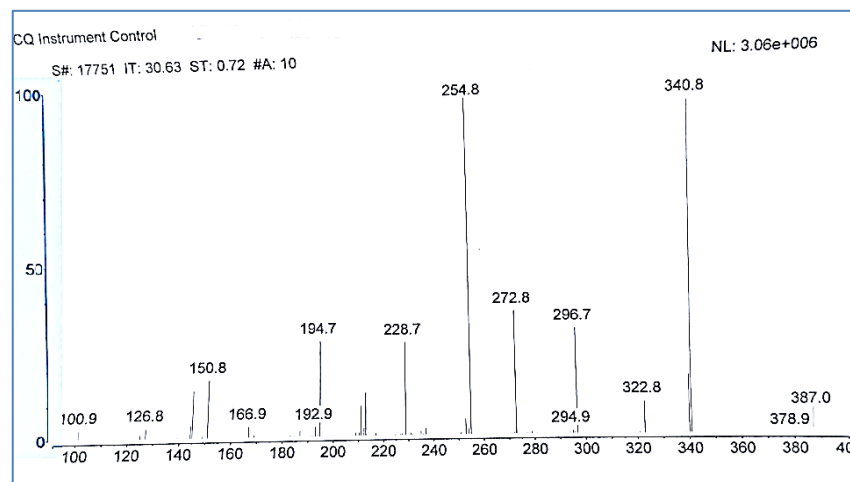

### NMR Spectral Data for the Compounds

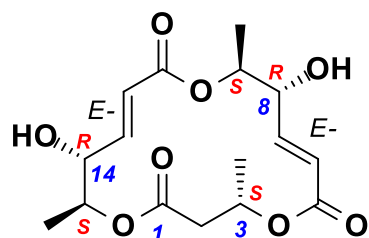

Chemical Formula: C<sub>16</sub>H<sub>22</sub>O<sub>8</sub>  
Molecular Weight: 342,34  
(+)-Macrosphelide A (1)

**Table S1.** Data of the NMR spectra for (+)-Macrosphelide A (1).

| Carbon number | <sup>1</sup> H NMR, δ, ppm                                                              | <sup>13</sup> C NMR, δ, ppm |
|---------------|-----------------------------------------------------------------------------------------|-----------------------------|
| <b>1</b>      | -                                                                                       | 170.10                      |
| <b>2</b>      | 2.56 (br s, 1H)<br>2.55 (br s, 1H)                                                      | 40.86                       |
| <b>3</b>      | 5.35-5.25 (m, 1H)                                                                       | 67.75                       |
| <b>5</b>      | -                                                                                       | 165.05                      |
| <b>6</b>      | 5.95 (dd, <sup>3</sup> J <sub>H-H</sub> 15.7, <sup>4</sup> J <sub>H-H</sub> 1.4 Hz, 1H) | 122.43                      |
| <b>7</b>      | 6.84 (dd, <sup>3</sup> J <sub>H-H</sub> 15.7, 9.5 Hz, 1H)                               | 145.87                      |
| <b>8</b>      | 4.16-4.12 (m, 1H)                                                                       | 74.09                       |
| <b>9</b>      | 4.94-4.85 (m, 1H)                                                                       | 74.35                       |
| <b>11</b>     | -                                                                                       | 165.74                      |
| <b>12</b>     | 5.98 (dd, <sup>3</sup> J <sub>H-H</sub> 15.6, <sup>4</sup> J <sub>H-H</sub> 1.4 Hz, 1H) | 121.99                      |
| <b>13</b>     | 6.82 (dd, <sup>3</sup> J <sub>H-H</sub> 15.6, 9.2 Hz, 1H)                               | 146.54                      |
| <b>14</b>     | 4.08-4.03 (m, 1H)                                                                       | 72.72                       |
| <b>15</b>     | 4.84-4.76 (m, 1H)                                                                       | 73.43                       |
| <b>Me-3</b>   | 1.28 (d, <sup>3</sup> J <sub>H-H</sub> 6.5 Hz, 3H)                                      | 19.52                       |
| <b>Me-9</b>   | 1.38 (d, <sup>3</sup> J <sub>H-H</sub> 6.5 Hz, 3H)                                      | 17.75                       |
| <b>Me-15</b>  | 1.31 (d, <sup>3</sup> J <sub>H-H</sub> 6.5 Hz, 3H)                                      | 17.60                       |
| <b>OH</b>     | 3.80 (br s, 1H)                                                                         |                             |
| <b>OH</b>     | 3.94 (br s, 1H)                                                                         |                             |

# **NMR Spectral Data for the Compounds**

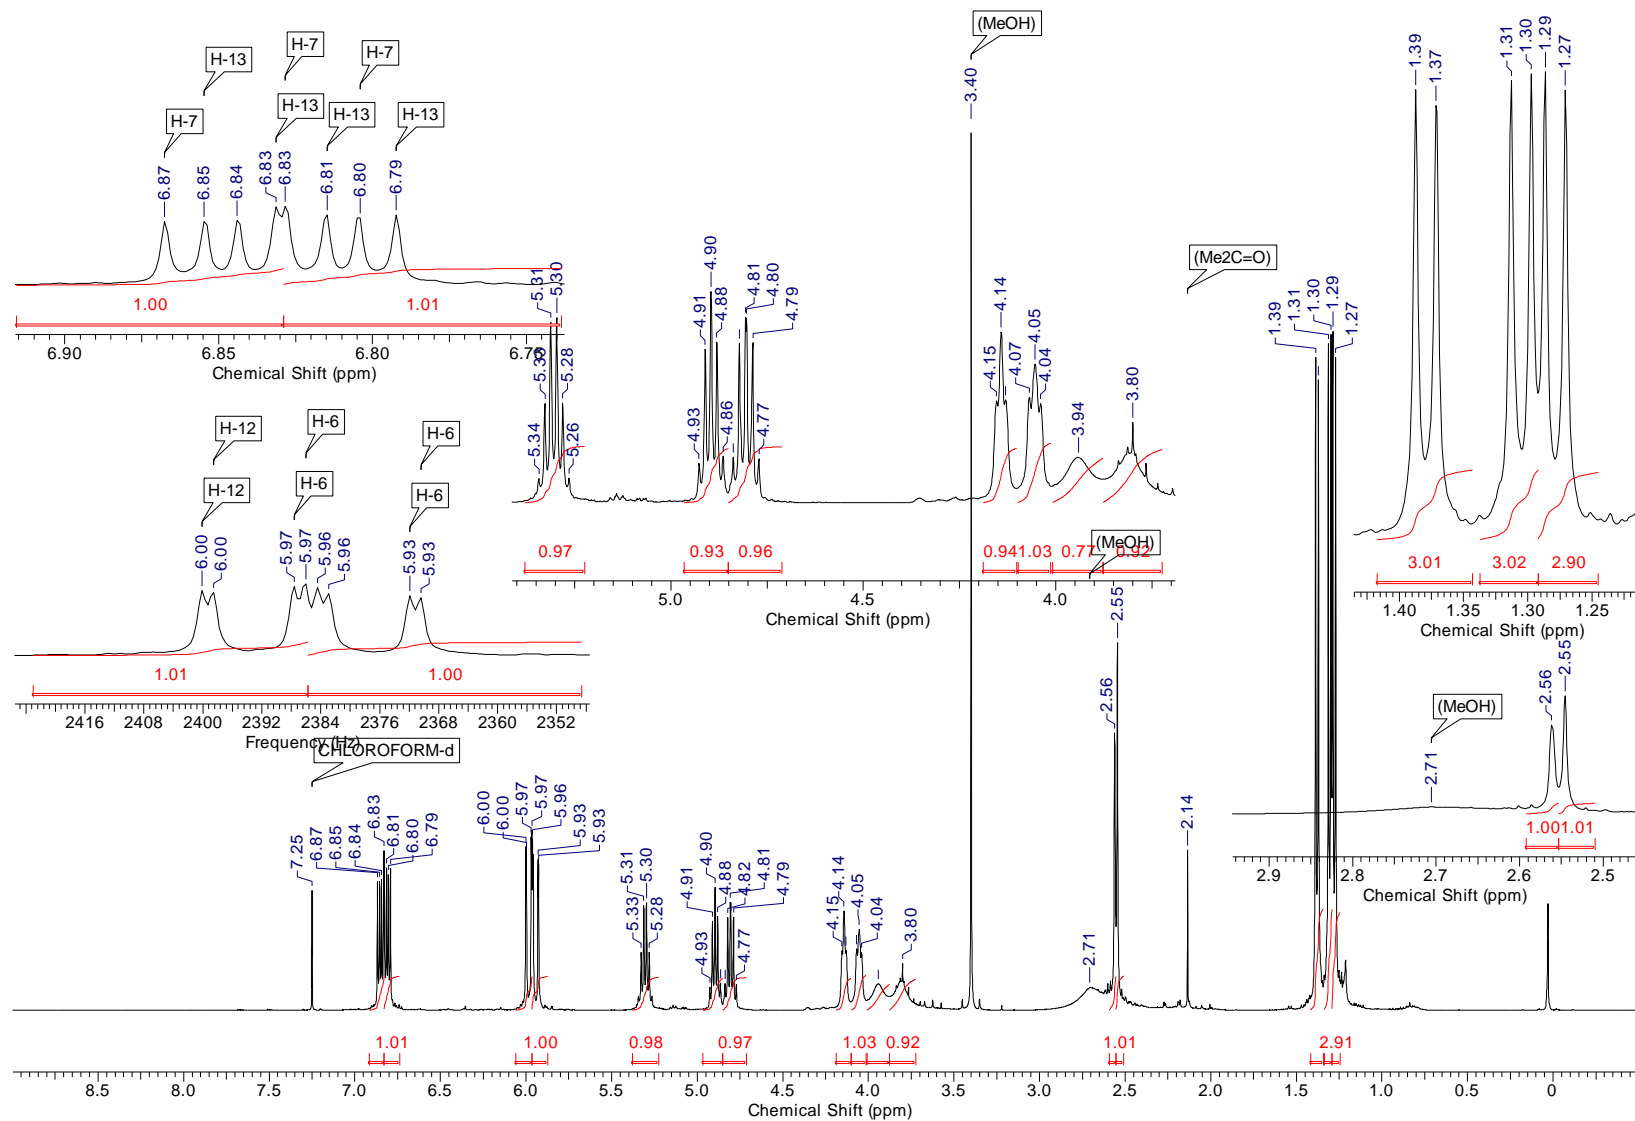

**Figure S2.**  $^1\text{H}$  NMR Spectrum of (+)-Macrosphelide A (1) ( $\text{CDCl}_3$ , RT).

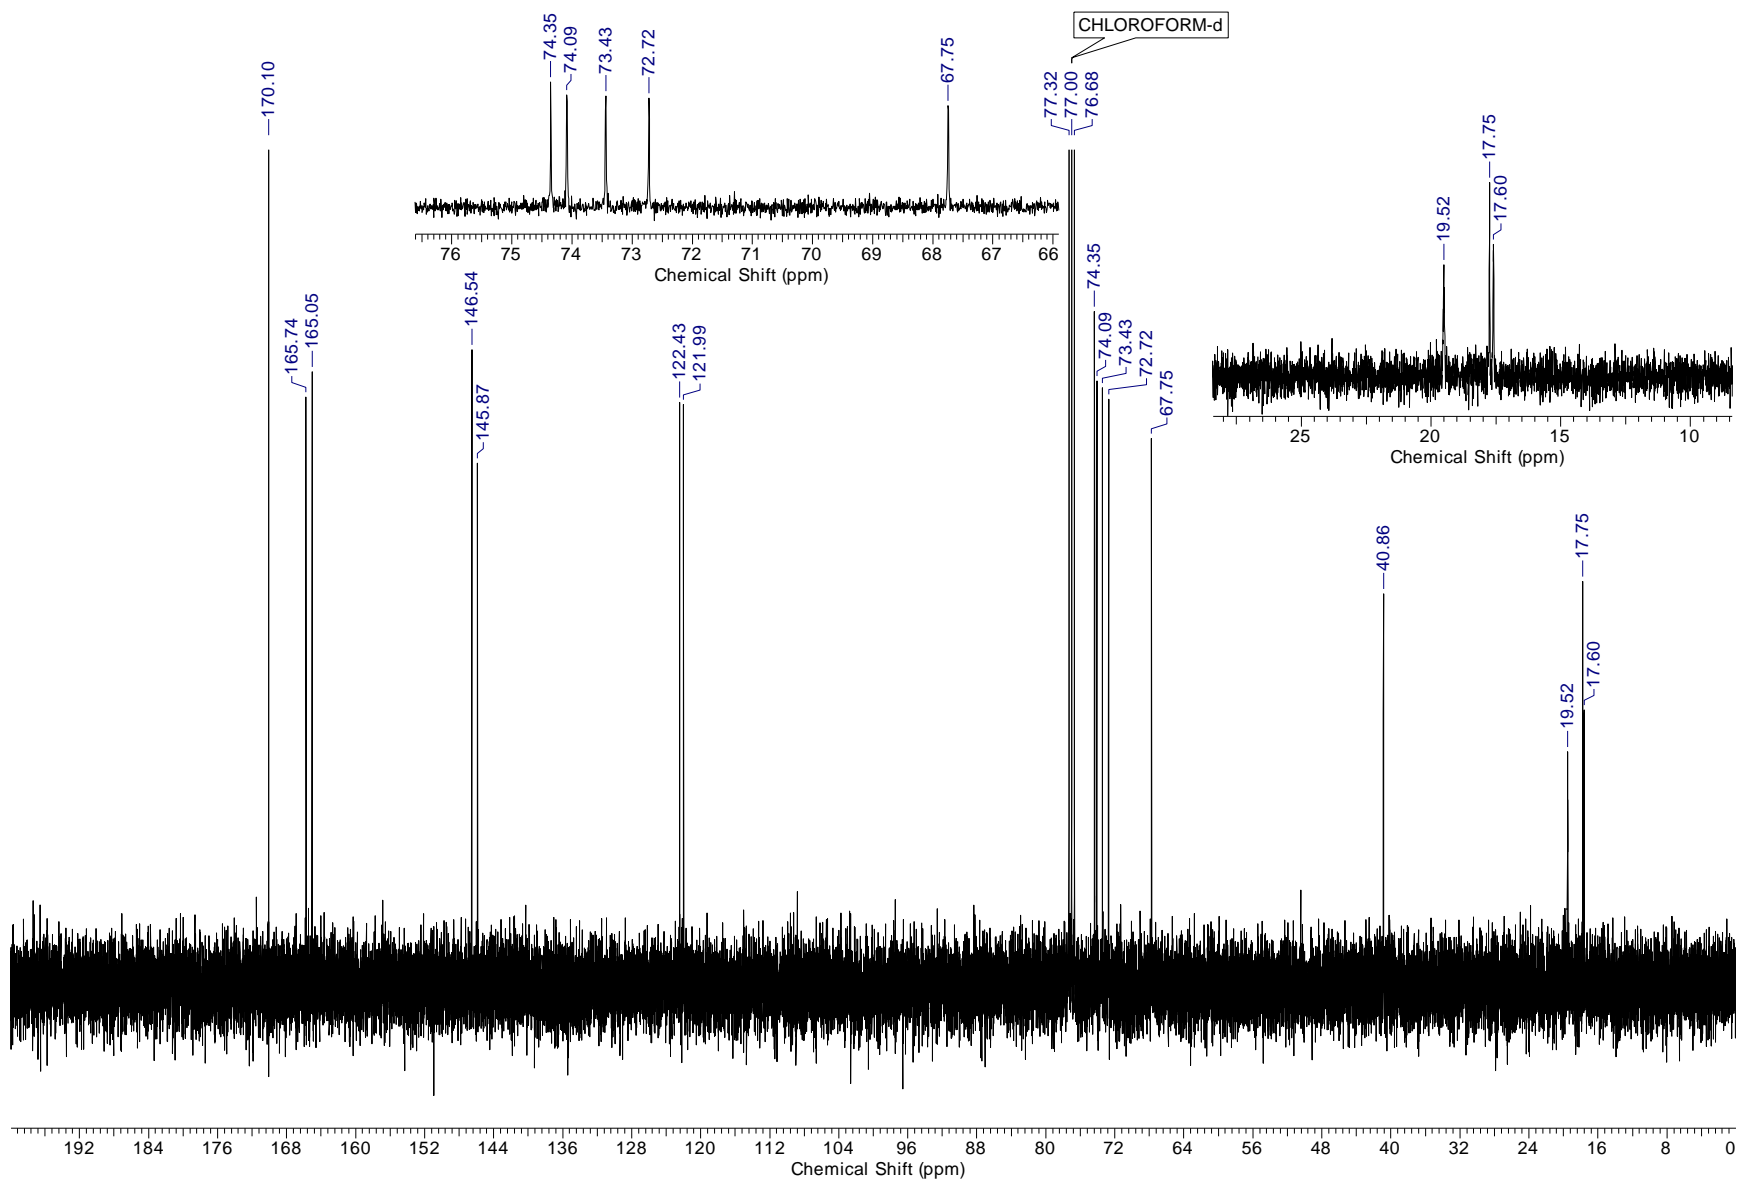

**Figure S3.**  $^{13}\text{C}$  NMR Spectrum of (+)-Macrosphelide A (**1**) ( $\text{CDCl}_3$ , RT).

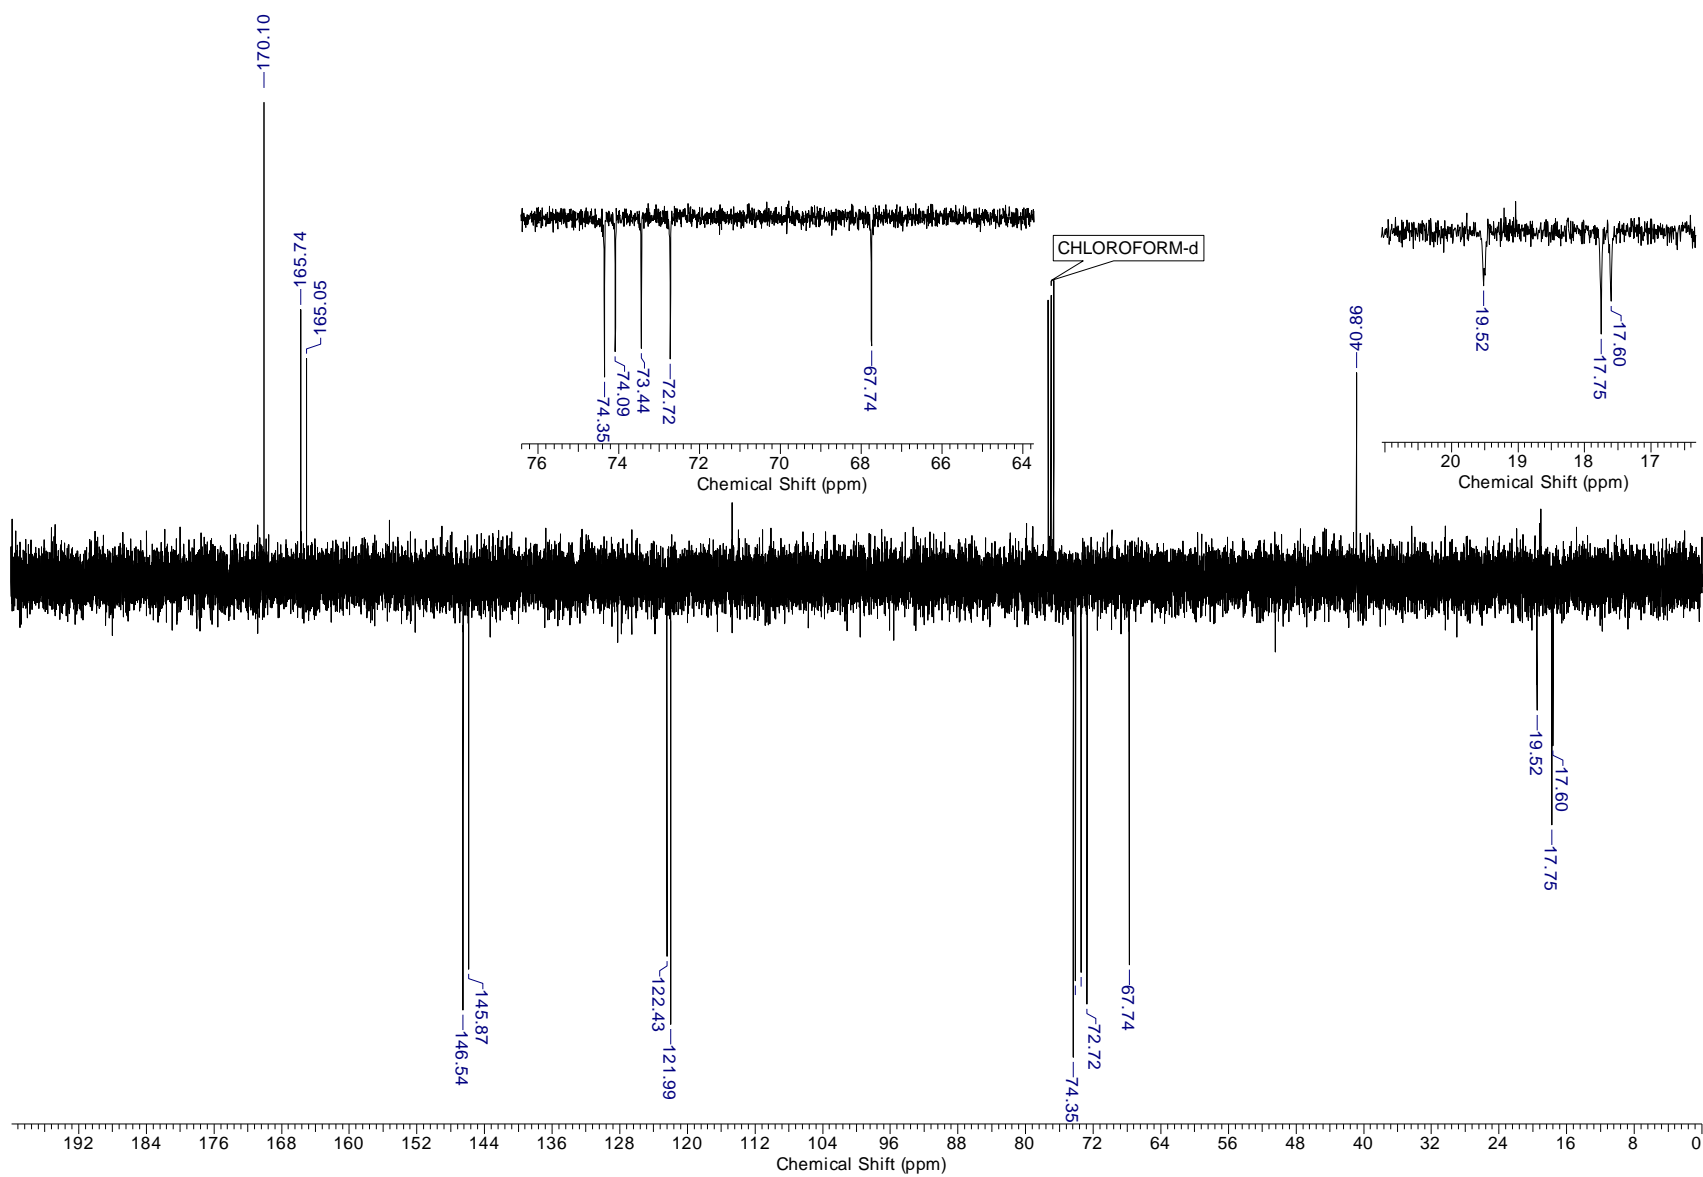

**Figure S4.**  $^{13}\text{C}$  APT NMR Spectrum of (+)-Macrosphelide A (**1**) ( $\text{CDCl}_3$ , RT).



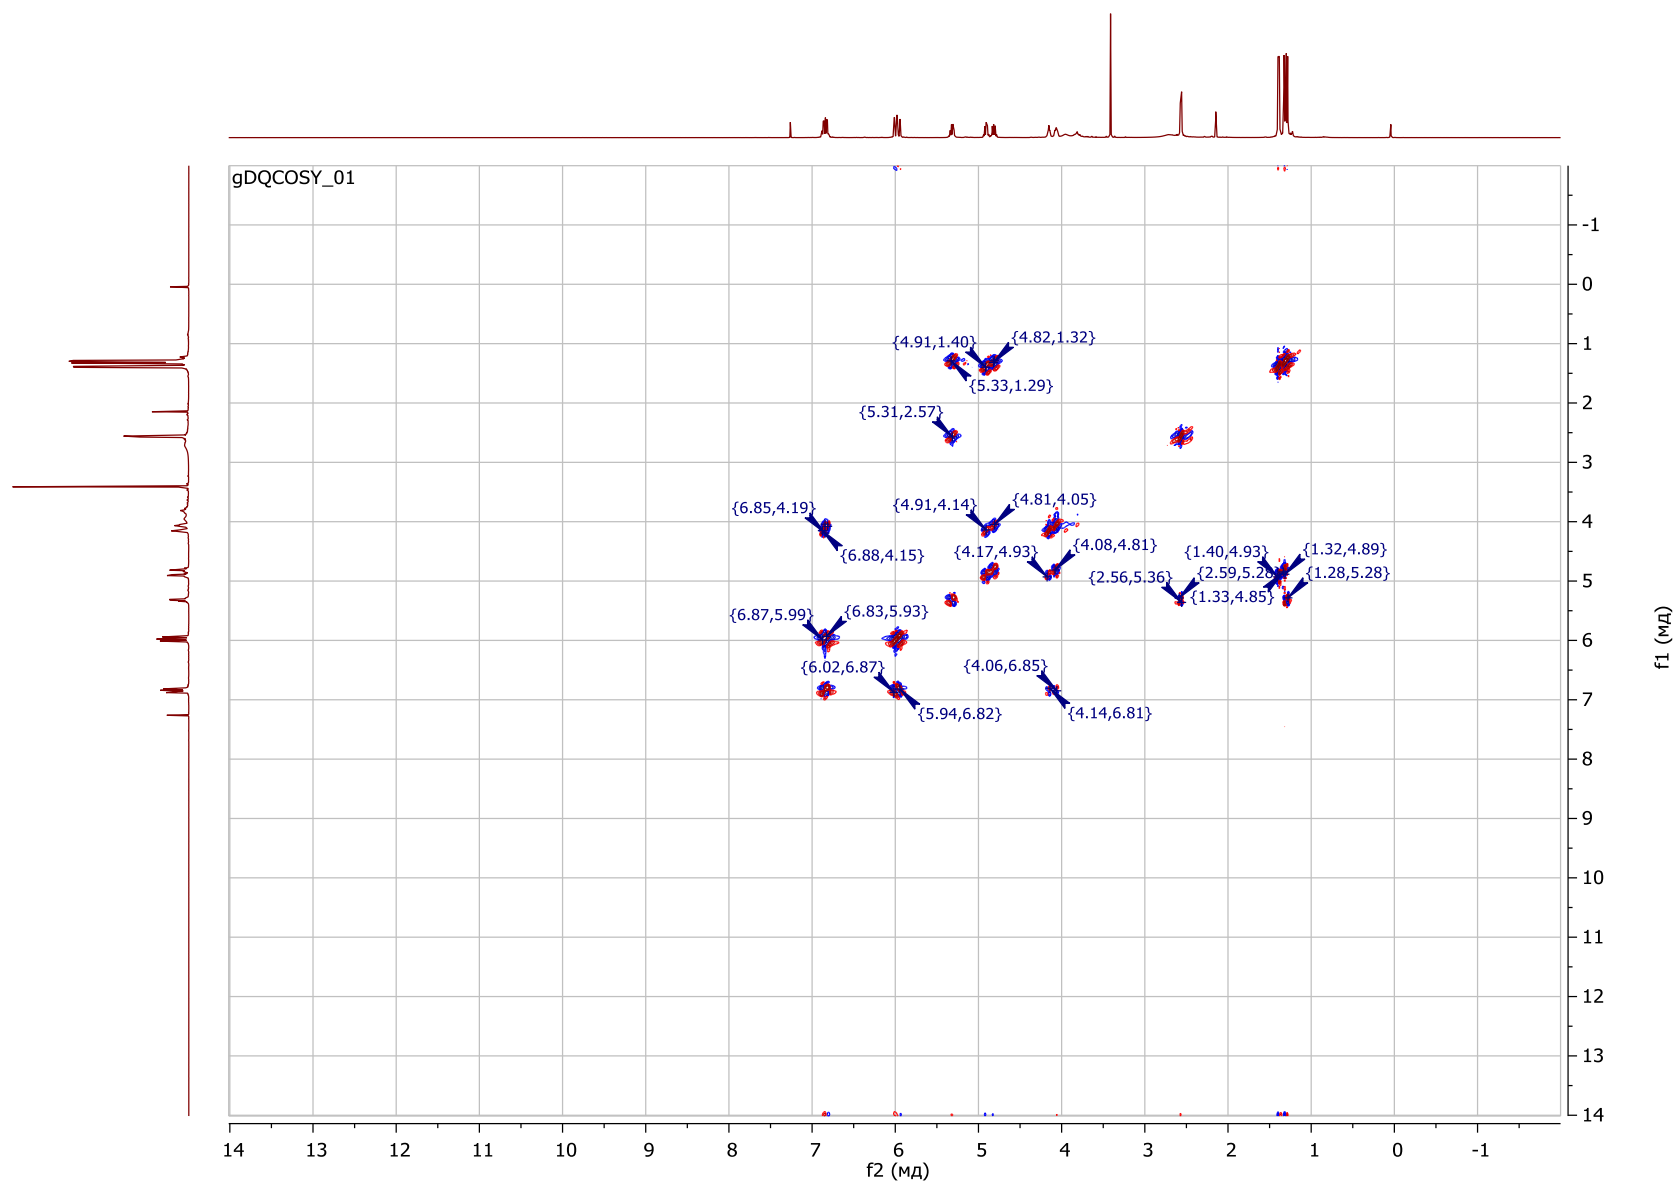

**Figure S5.**  $^1\text{H}$ - $^1\text{H}$  COSY NMR Spectrum of (+)-Macrosphelide A (**1**) ( $\text{CDCl}_3$ , RT).

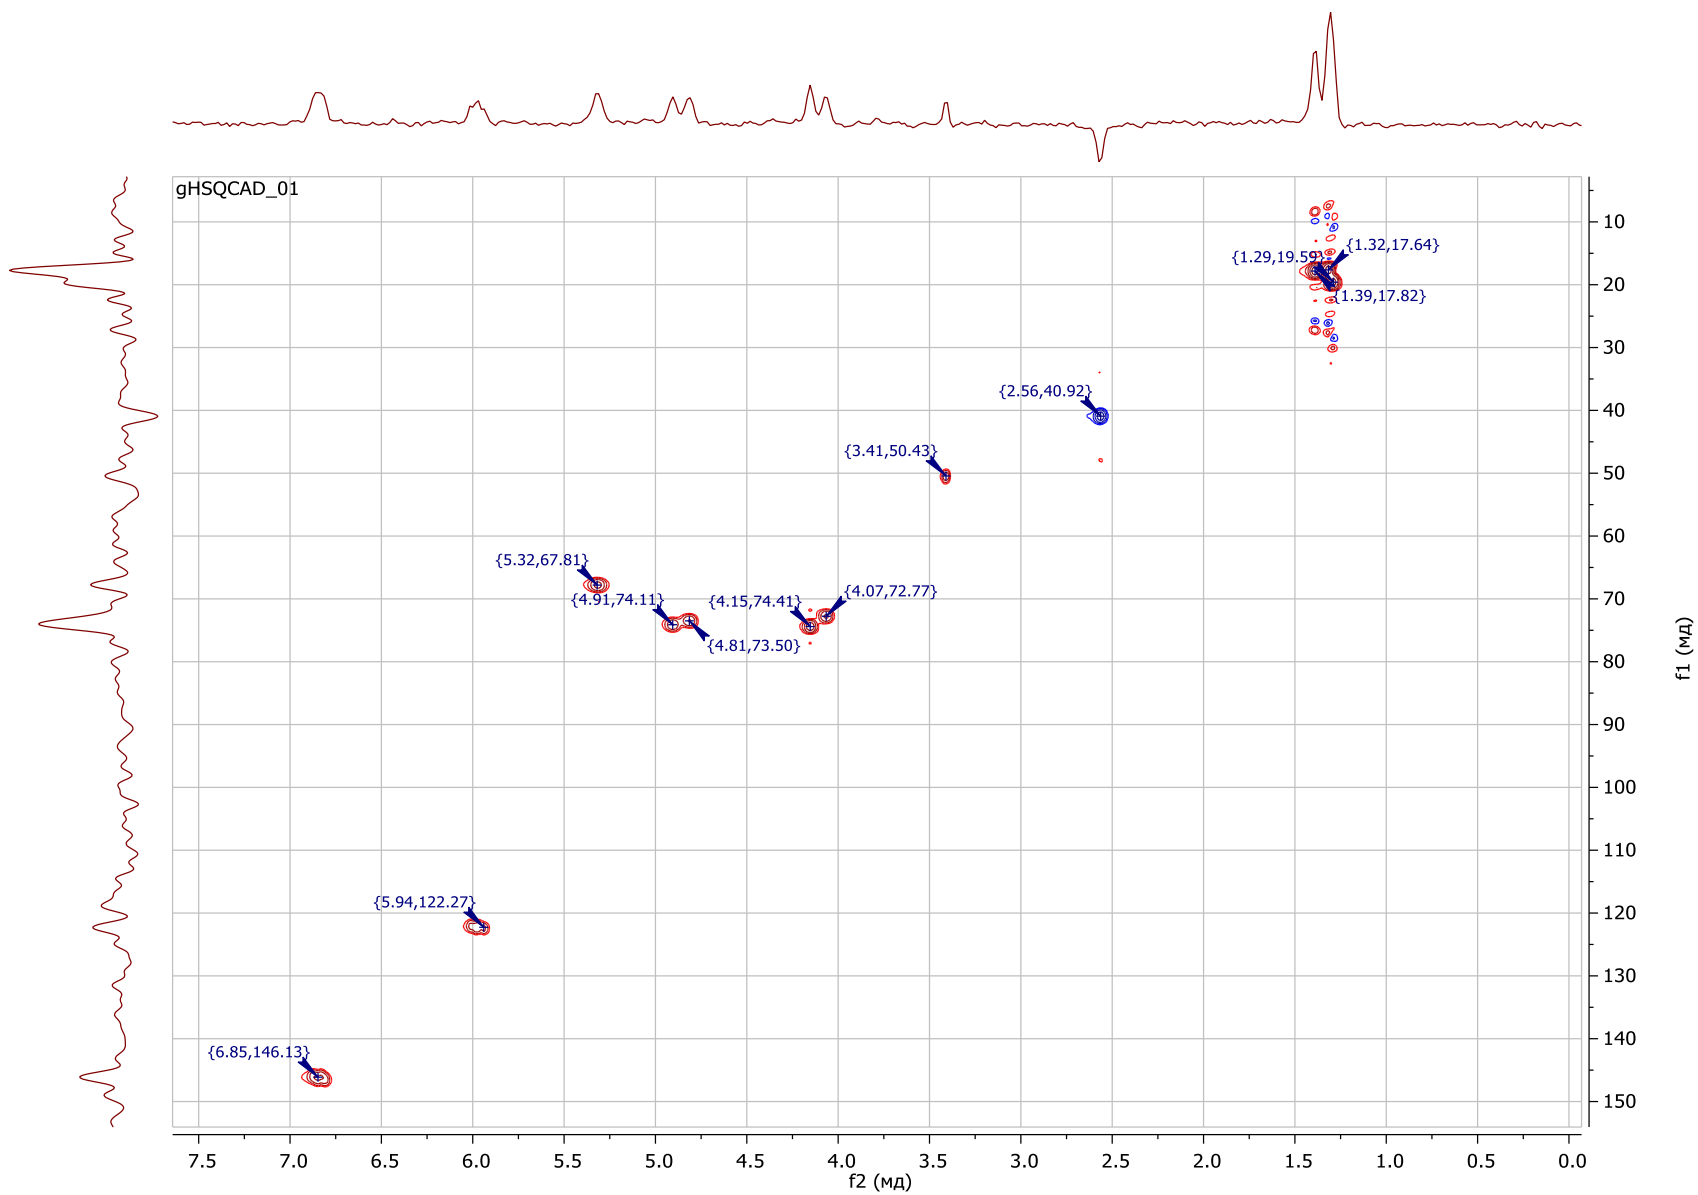

**Figure S6.** HSQC NMR spectrum of (+)-Macrosphelide A (**1**) ( $\text{CDCl}_3$ , RT).

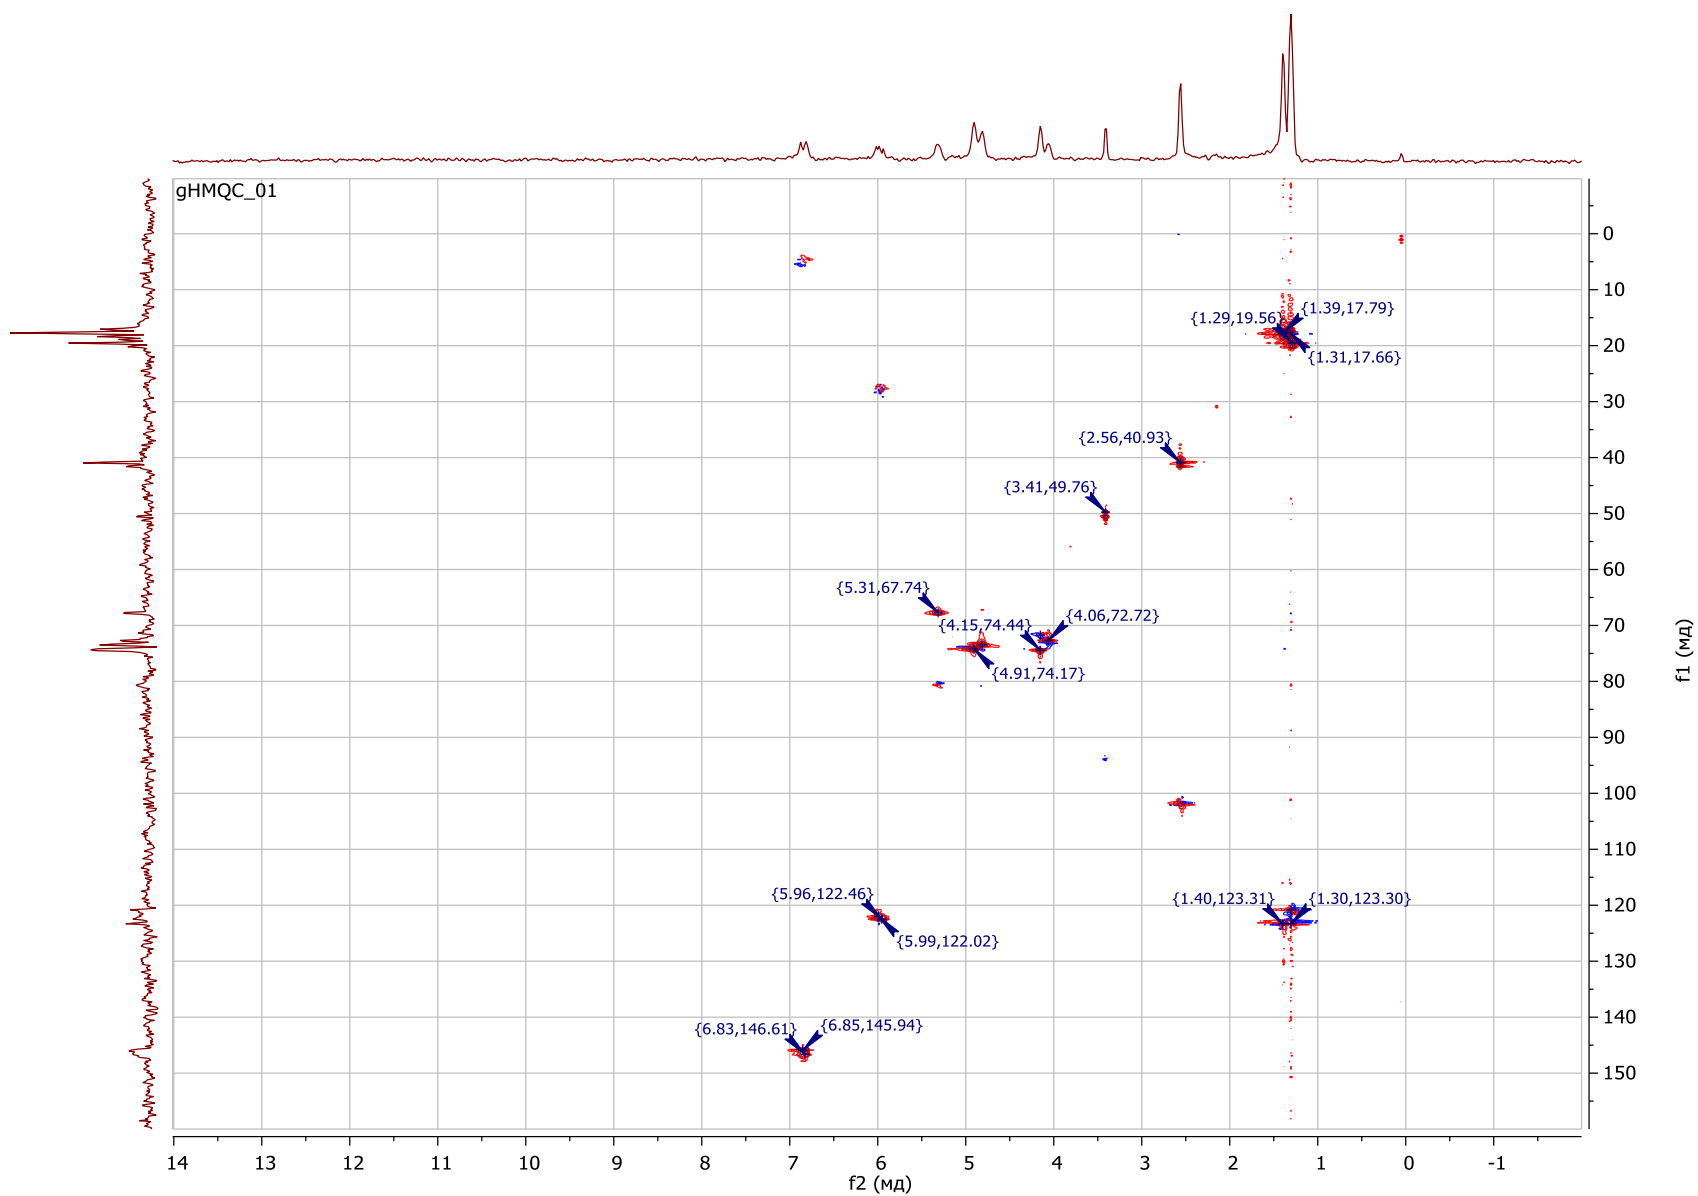

**Figure S7.** HMQC NMR Spectrum of (+)-Macrosphelide A (**1**) (CDCl<sub>3</sub>, RT).

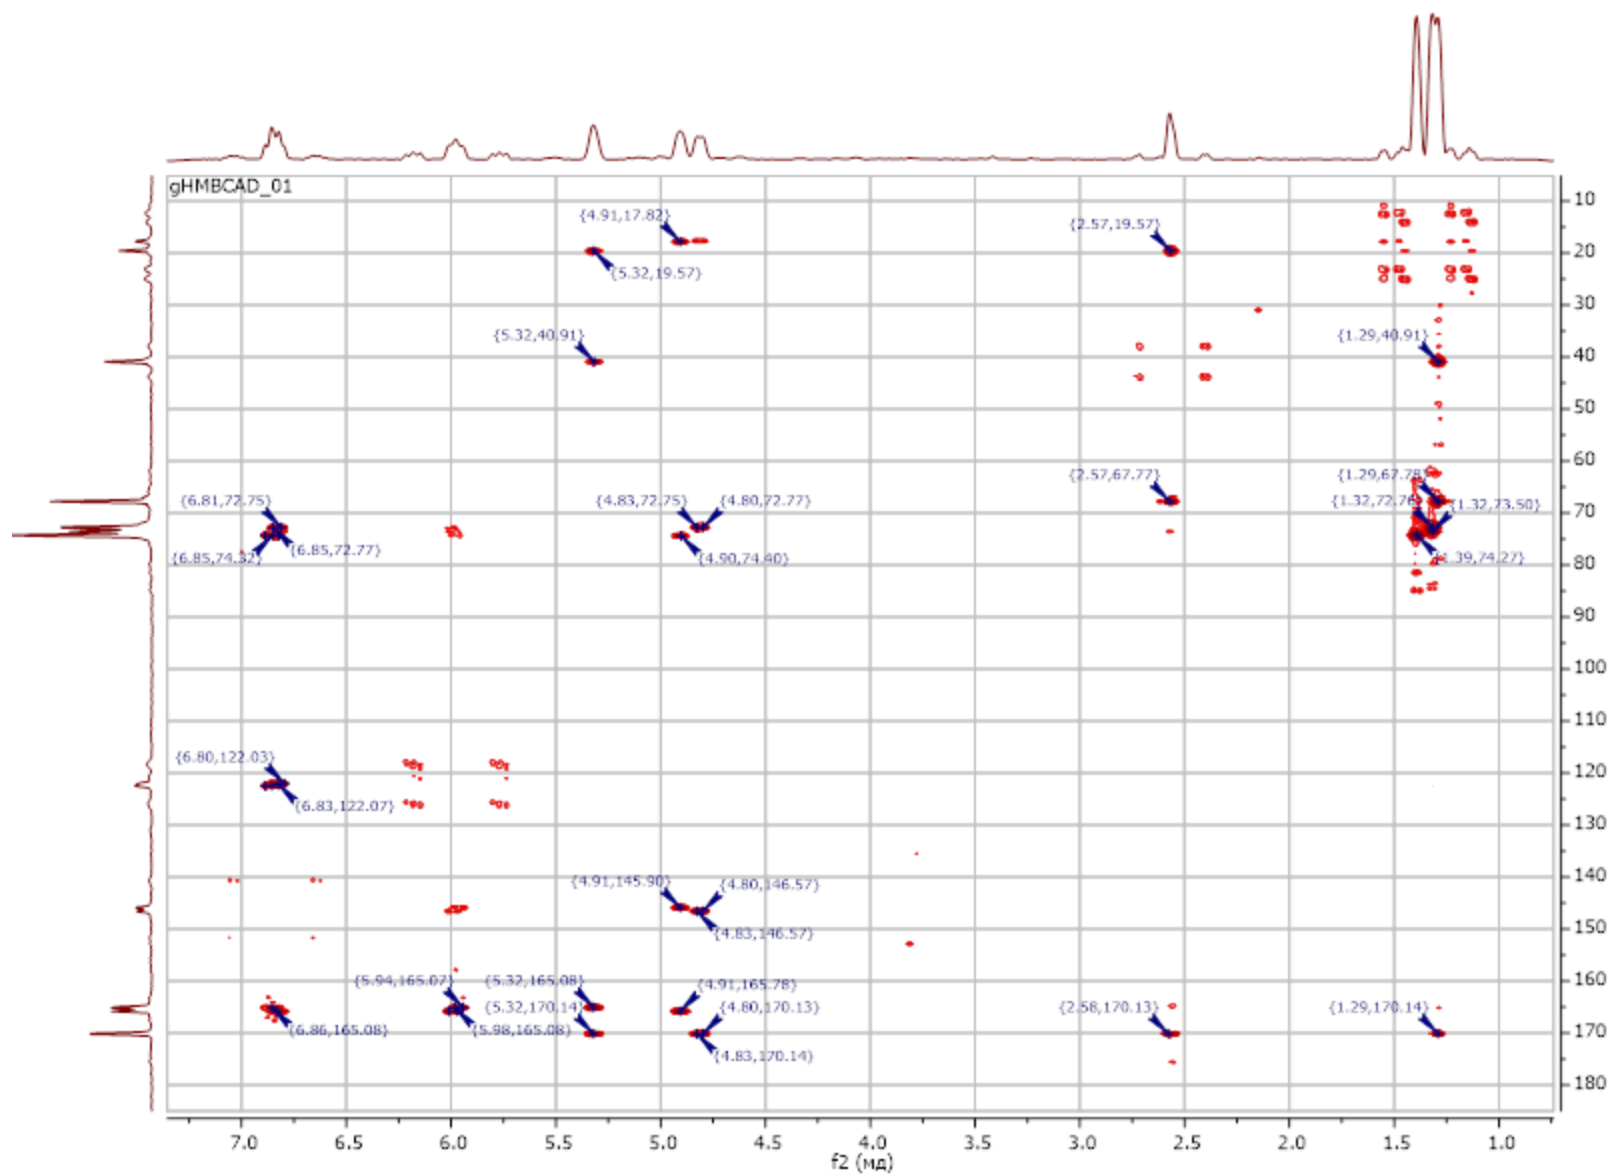

**Figure S8.** HMBC NMR spectrum of (+)-Macrosphelide A (**1**) (CDCl<sub>3</sub>, RT).

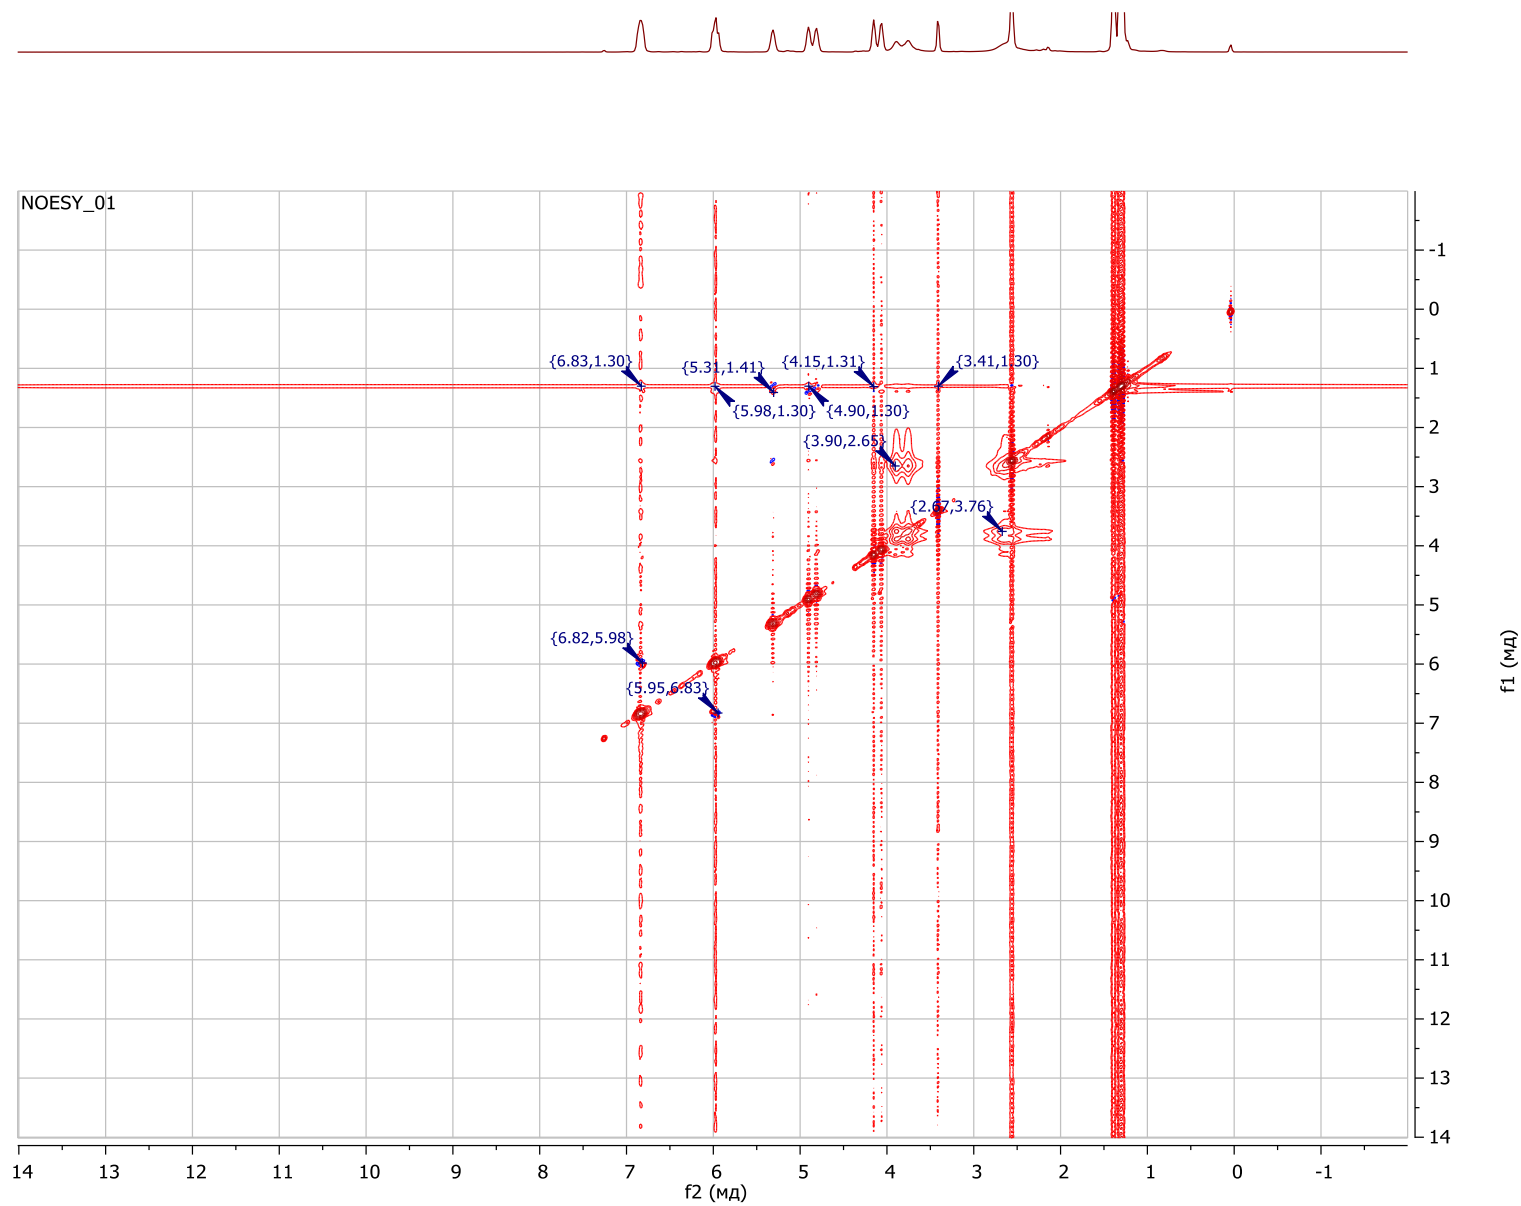

**Figure S9.** NOESY NMR spectrum of (+)-Macrosphelide A (**1**) (CDCl<sub>3</sub>, RT).

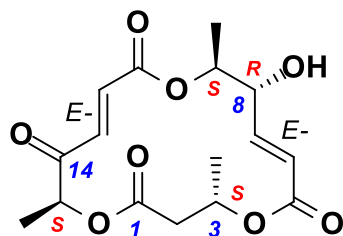

Chemical Formula:  $C_{16}H_{20}O_8$   
Molecular Weight: 340,33  
(+)-Macrosphelide B (2)

**Table S2.** Data of the NMR spectra for (+)-Macrosphelide B (2).

| Carbon number | $^1H$ NMR, $\delta$ , ppm                                                                                   | $^{13}C$ NMR, $\delta$ , ppm |
|---------------|-------------------------------------------------------------------------------------------------------------|------------------------------|
| <b>1</b>      | -                                                                                                           | 170.33                       |
| <b>2</b>      | 2.81 (dd, $^2J_{H-H}$ 16.2, $^3J_{H-H}$ 11.2 Hz, 1H)<br>2.61 (dd, $^2J_{H-H}$ 16.2, $^2J_{H-H}$ 2.3 Hz, 1H) | 40.59                        |
| <b>3</b>      | 5.47-5.40 (m, 1H)                                                                                           | 67.70                        |
| <b>5</b>      | -                                                                                                           | 164.23                       |
| <b>6</b>      | 6.07 (dd, $^3J_{H-H}$ 15.8, $^4J_{H-H}$ 2.0 Hz, 1H)                                                         | 122.50                       |
| <b>7</b>      | 6.90 (dd, $^3J_{H-H}$ 15.8, 3.8 Hz, 1H)                                                                     | 144.37                       |
| <b>8</b>      | 4.32-4.28 (m, 1H)                                                                                           | 74.73                        |
| <b>9</b>      | 5.08-5.01 (m, 2H) *                                                                                         | 75.75                        |
| <b>11</b>     | -                                                                                                           | 165.30                       |
| <b>12</b>     | 7.01 (d, $^3J_{H-H}$ 15.7 Hz, 1H)                                                                           | 132.05                       |
| <b>13</b>     | 6.72 (d, $^3J_{H-H}$ 15.7 Hz, 1H)                                                                           | 132.54                       |
| <b>14</b>     | -                                                                                                           | 196.19                       |
| <b>15</b>     | 5.08-5.01 (m, 2H) *                                                                                         | 76.71                        |
| <b>Me-3</b>   | 1.34 (d, $^3J_{H-H}$ 6.4 Hz, 3H)                                                                            | 19.77                        |
| <b>Me-9</b>   | 1.48 (d, $^3J_{H-H}$ 6.8 Hz, 3H)                                                                            | 17.88                        |
| <b>Me-15</b>  | 1.42 (d, $^3J_{H-H}$ 7.8 Hz, 3H)                                                                            | 16.04                        |
| <b>OH-3</b>   | 1.23 (br s, 1H)                                                                                             |                              |

\* protons H-9 and H-15 are overlapped

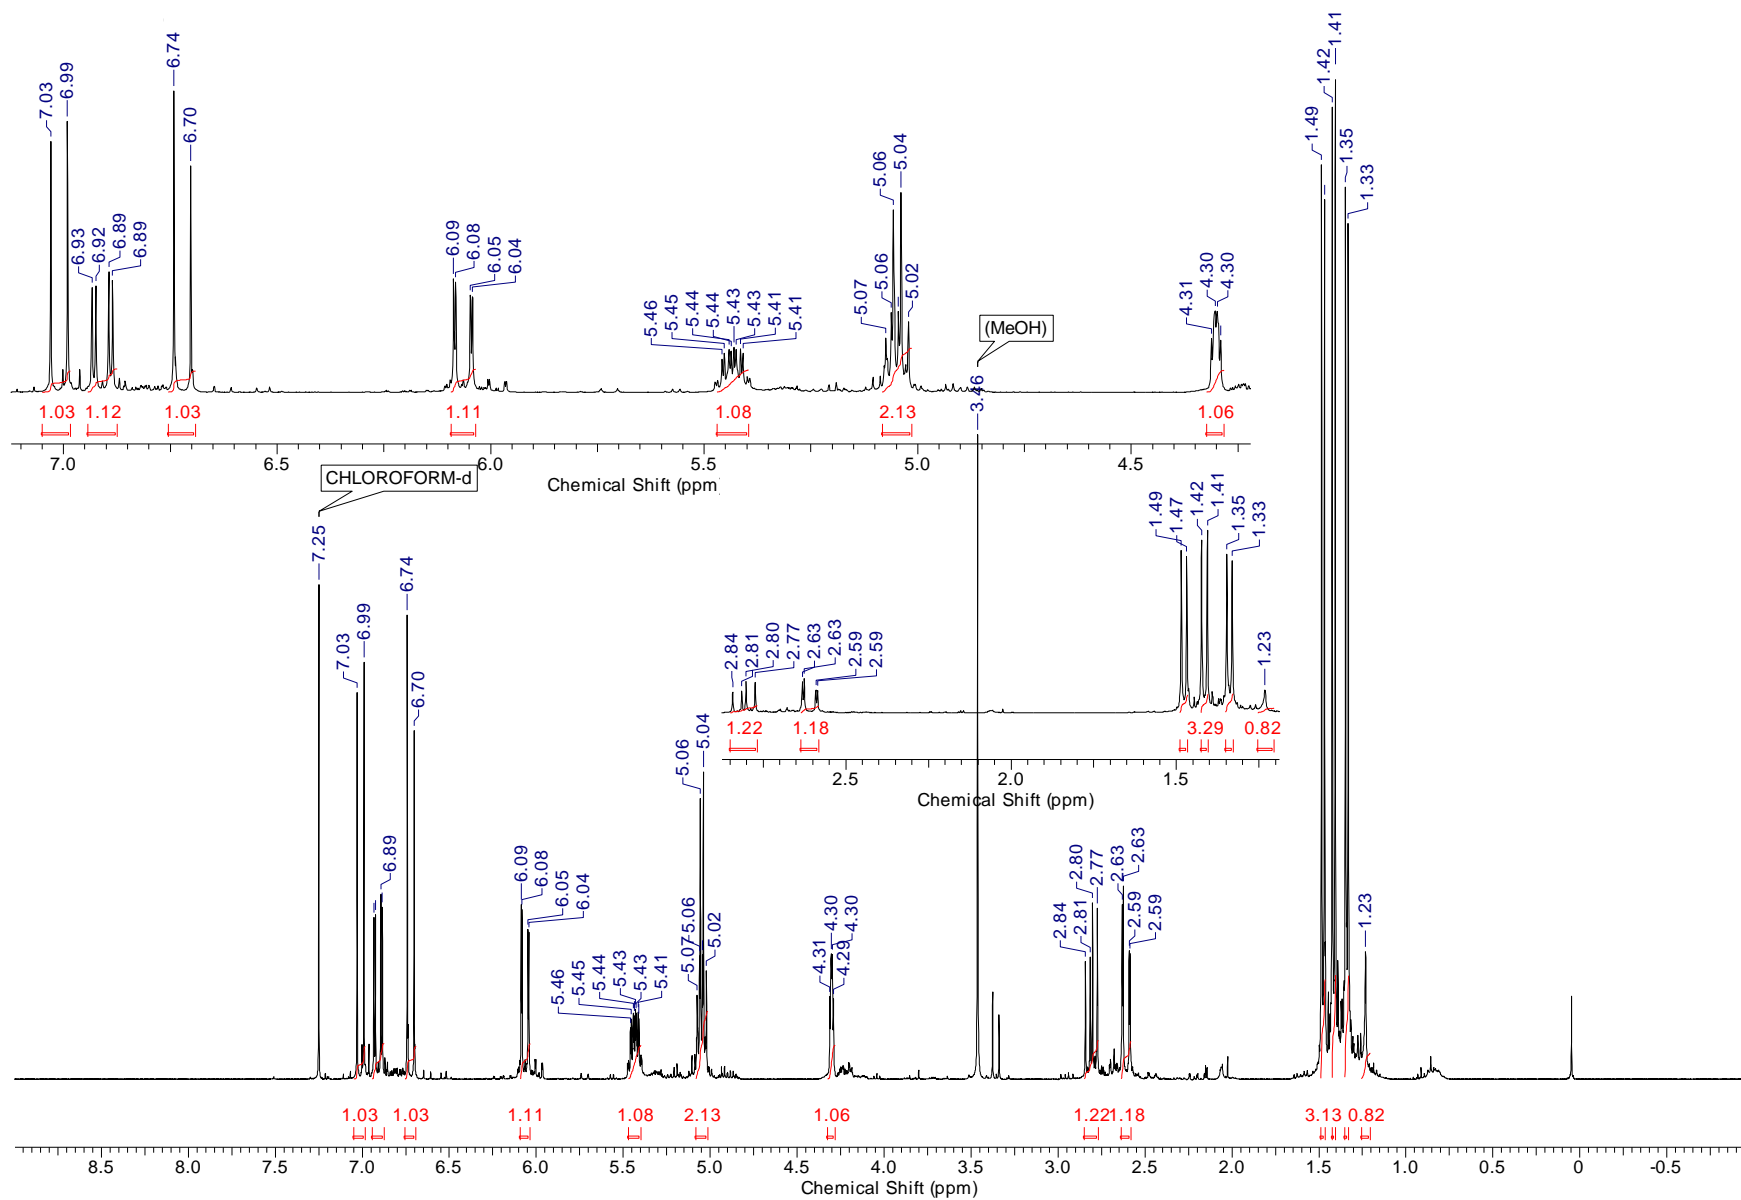

**Figure S10.**  $^1\text{H}$  NMR Spectrum of (+)-Macrosphelide B (2) ( $\text{CDCl}_3$ , RT).

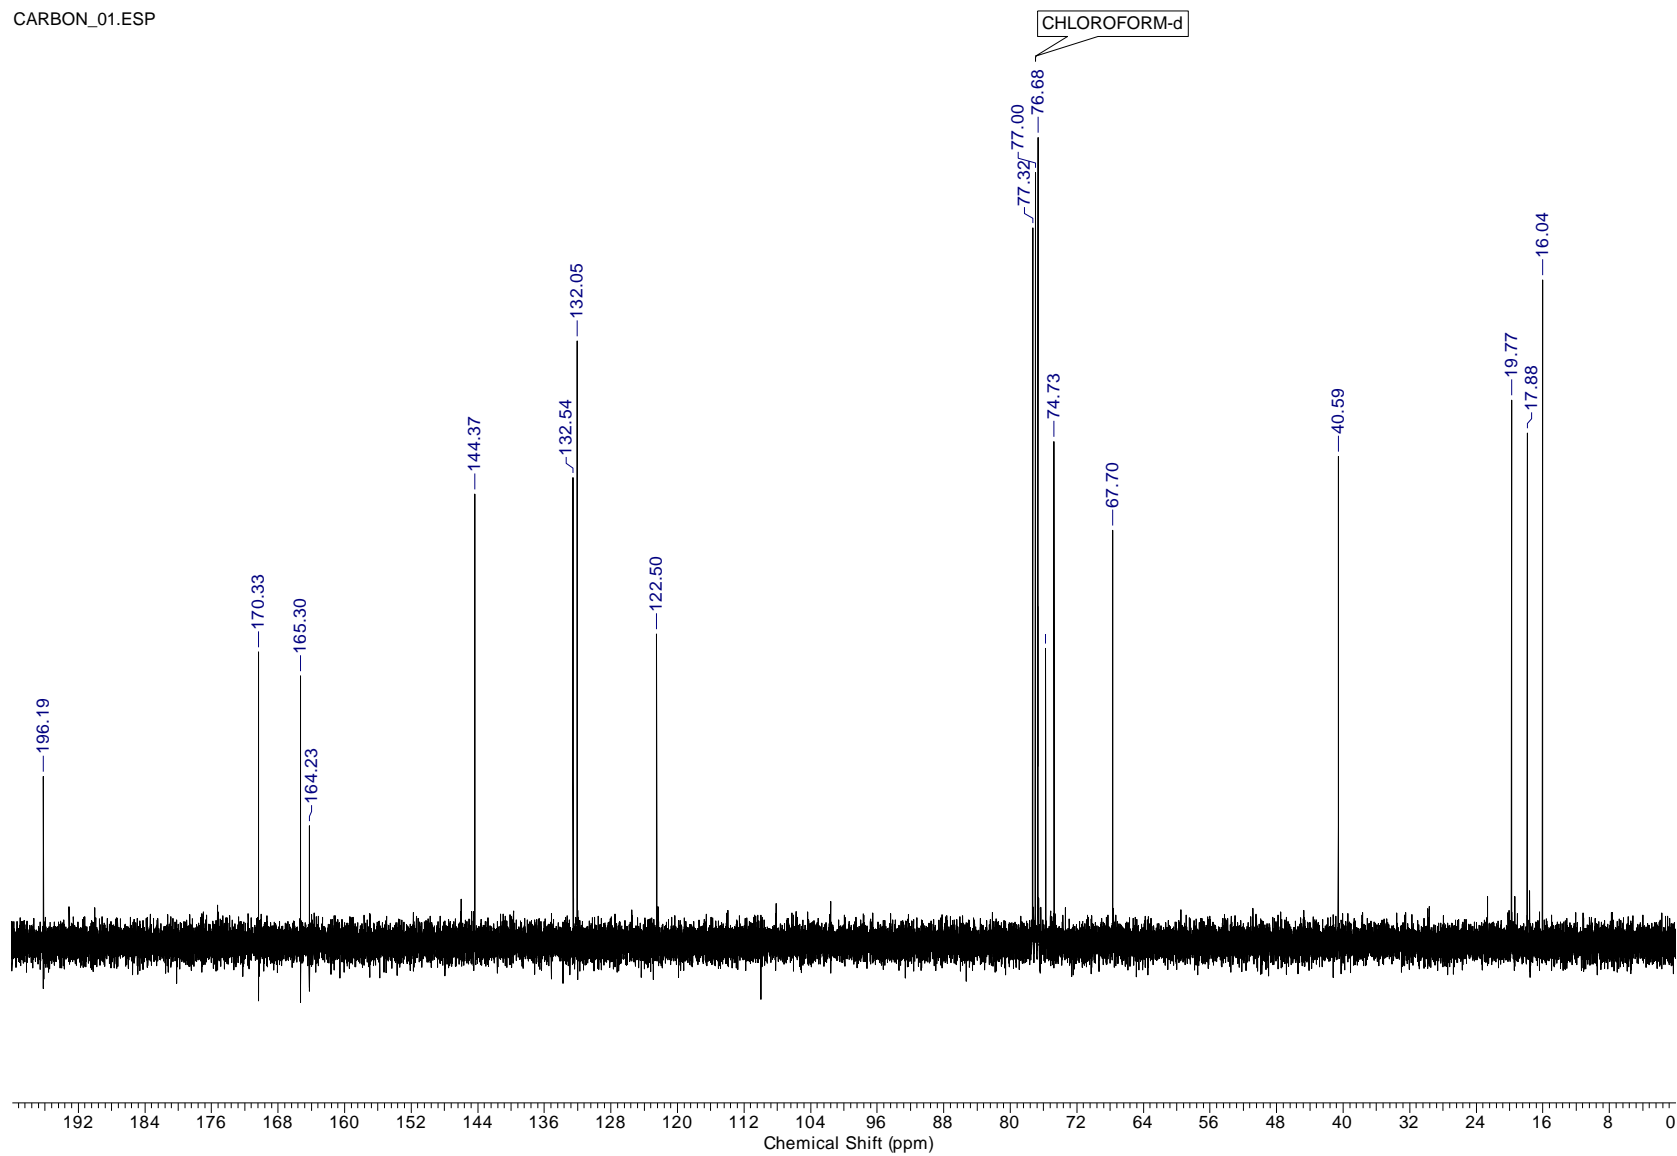

**Figure S11.** <sup>13</sup>C NMR Spectrum of (+)-Macrosphelide B (**2**) (CDCl<sub>3</sub>, RT).



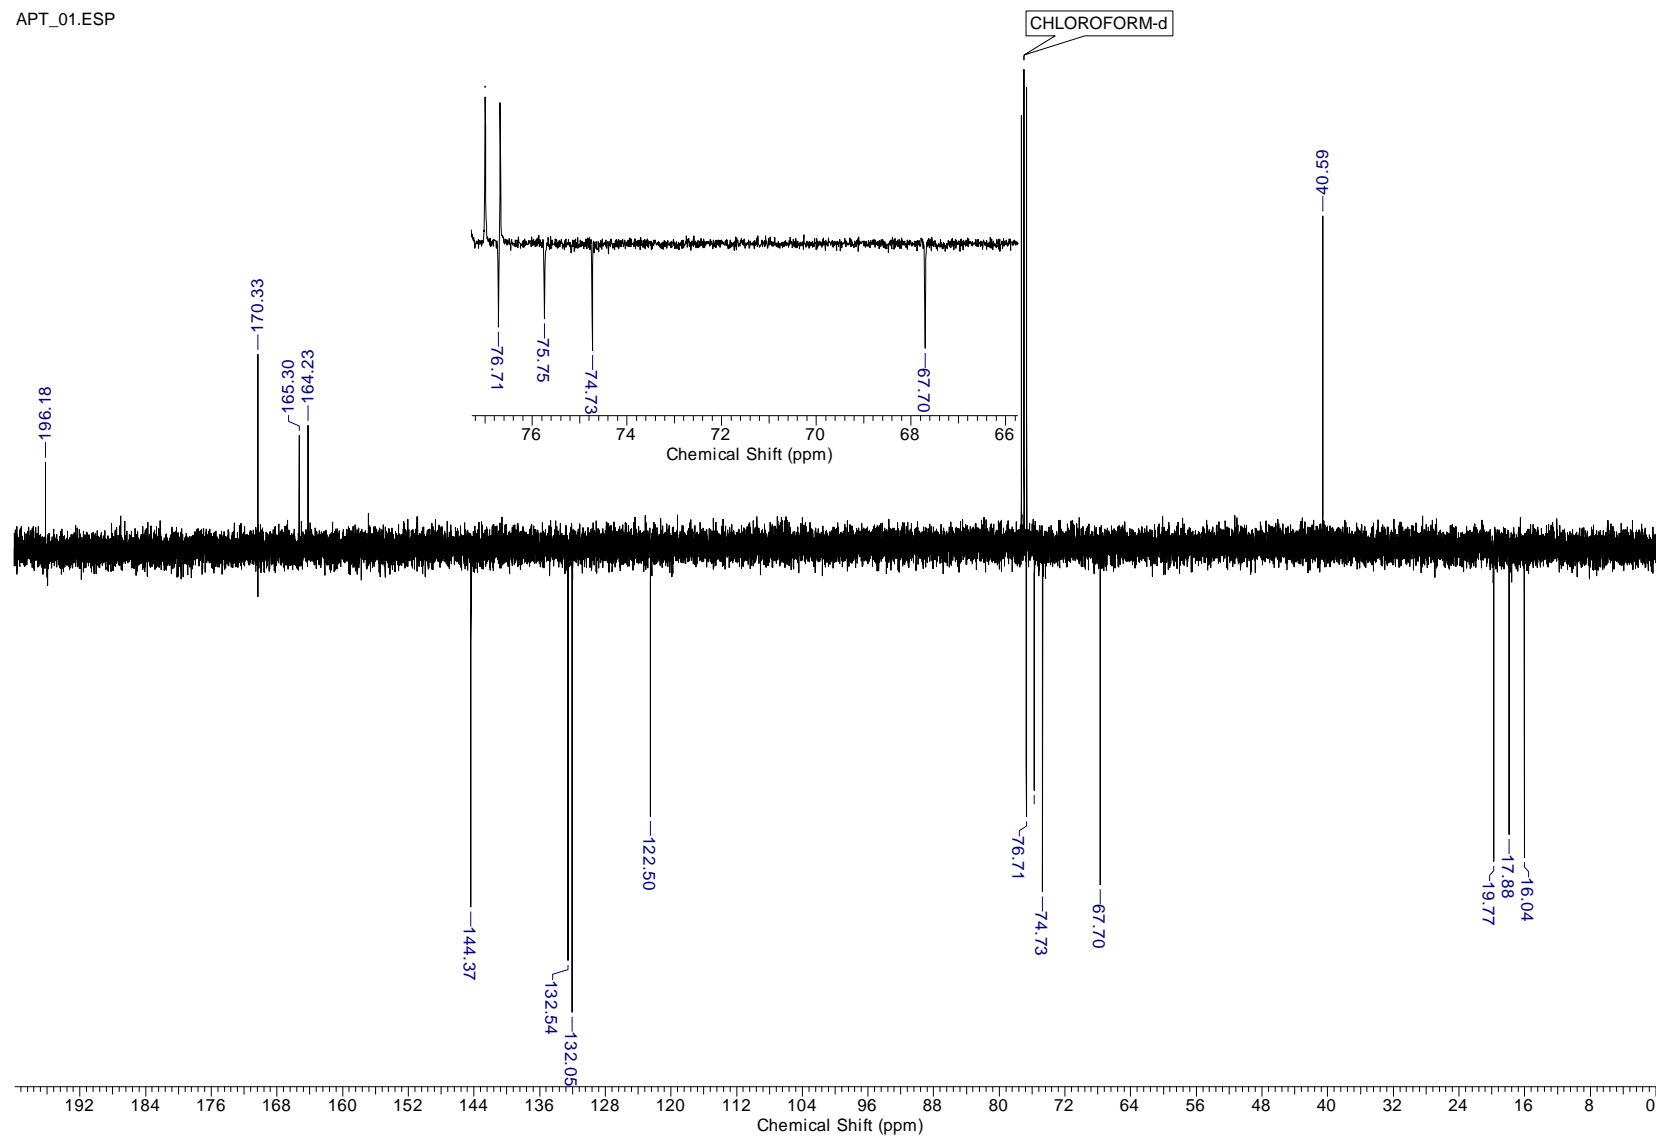

**Figure S12.**  $^{13}\text{C}$  APT NMR Spectrum of (+)-Macrosphelide B (**2**) ( $\text{CDCl}_3$ , RT).

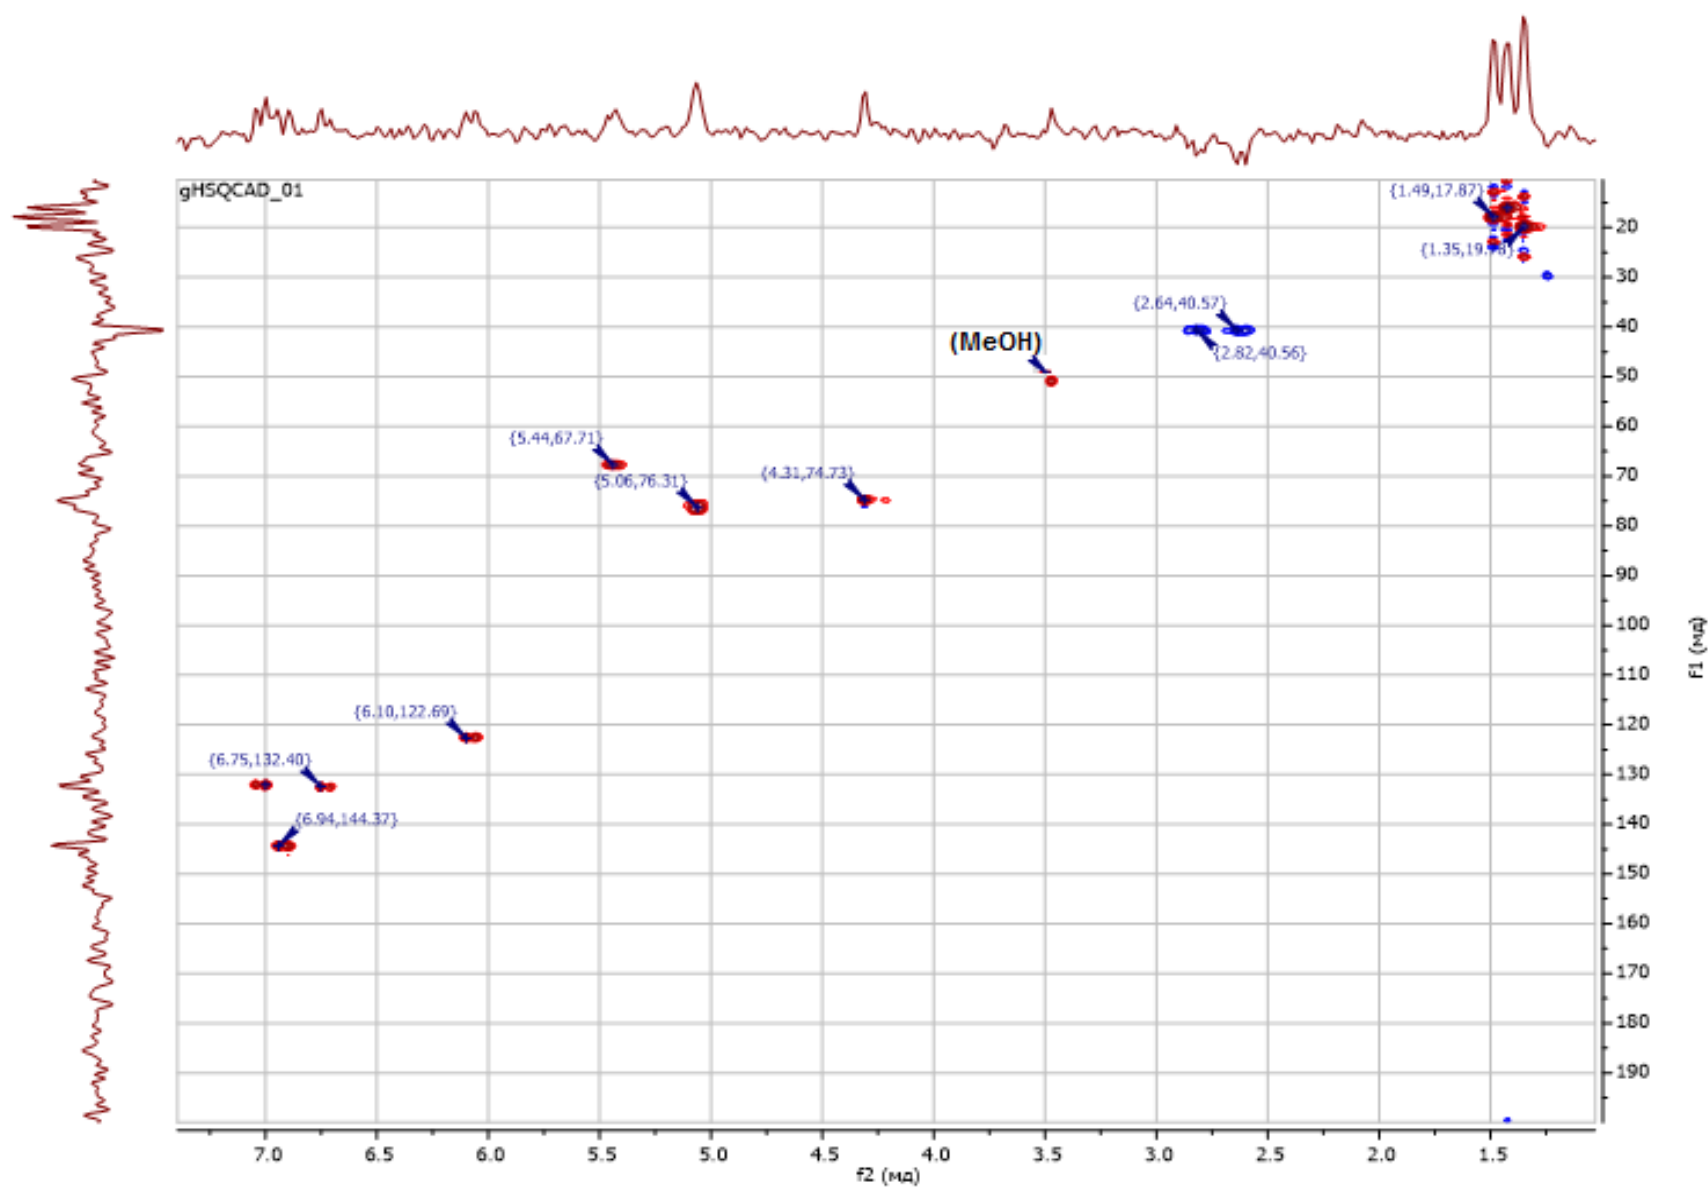

**Figure S13.** HSQC NMR Spectrum of (+)-Macrosphelide B (**2**) ( $\text{CDCl}_3$ , RT).

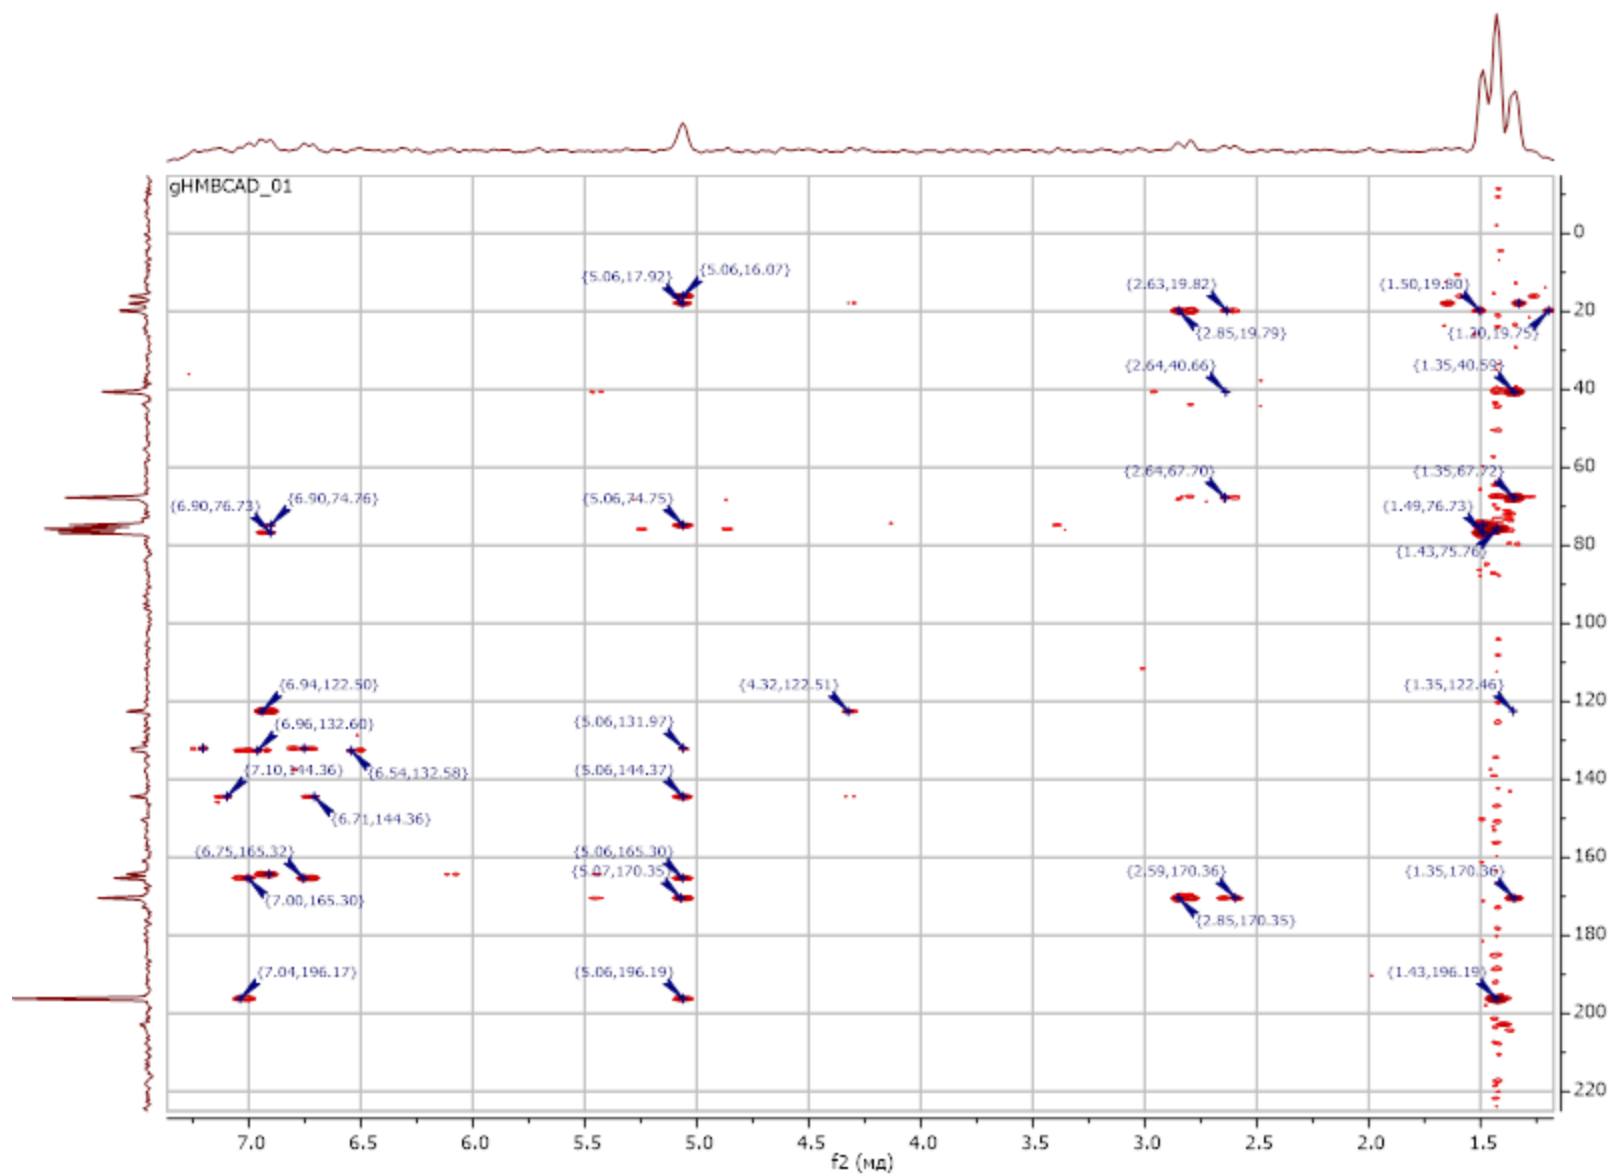

**Figure S14.** HMBC NMR Spectrum of (+)-Macrosphelide B (**2**) (CDCl<sub>3</sub>, RT).

### Additional data on genome analysis

| Region       | Type                        | From   | To     | Most similar known cluster                                                                                                              |                                        | Similarity |
|--------------|-----------------------------|--------|--------|-----------------------------------------------------------------------------------------------------------------------------------------|----------------------------------------|------------|
| Region 1.1   | T1PKS                       | 1      | 15,076 | ustilaginoidin N/ustilaginoidin O/ustilaginoidin M/ustilaginoidin A/ustilaginoidin F/ustilaginoidin E/ustilaginoidin D/ustilaginoidin G | Polyketide                             | 23%        |
| Region 31.1  | T3PKS                       | 1      | 10,927 |                                                                                                                                         |                                        |            |
| Region 32.1  | fungal-RIPP-like<br>terpene | 15,383 | 64,173 |                                                                                                                                         |                                        |            |
| Region 40.1  | fungal-RIPP-like            | 1      | 13,166 |                                                                                                                                         |                                        |            |
| Region 53.1  | T1PKS                       | 6,889  | 32,830 | secalonic acids                                                                                                                         | Polyketide                             | 12%        |
| Region 213.1 | NRPS                        | 1      | 39,657 |                                                                                                                                         |                                        |            |
| Region 230.1 | NRPS                        | 1      | 20,339 |                                                                                                                                         |                                        |            |
| Region 234.1 | T1PKS                       | 1      | 2,705  |                                                                                                                                         |                                        |            |
| Region 250.1 | fungal-RIPP-like            | 1      | 9,011  |                                                                                                                                         |                                        |            |
| Region 254.1 | terpene                     | 1      | 7,416  |                                                                                                                                         |                                        |            |
| Region 270.1 | fungal-RIPP-like            | 1      | 9,834  |                                                                                                                                         |                                        |            |
| Region 271.1 | fungal-RIPP-like            | 1      | 35,154 |                                                                                                                                         |                                        |            |
| Region 327.1 | fungal-RIPP-like            | 1      | 12,140 |                                                                                                                                         |                                        |            |
| Region 342.1 | T1PKS                       | 1      | 21,697 |                                                                                                                                         |                                        |            |
| Region 343.1 | NRPS                        | 1      | 24,150 |                                                                                                                                         |                                        |            |
| Region 349.1 | NRPS                        | 1      | 17,423 |                                                                                                                                         |                                        |            |
| Region 399.1 | T1PKS                       | 1      | 39,308 |                                                                                                                                         |                                        |            |
| Region 401.1 | fungal-RIPP-like            | 1      | 47,258 |                                                                                                                                         |                                        |            |
| Region 410.1 | T1PKS                       | 1      | 16,082 |                                                                                                                                         |                                        |            |
| Region 416.1 | NRPS                        | 1      | 31,458 |                                                                                                                                         |                                        |            |
| Region 443.1 | NRPS                        | 1      | 27,038 |                                                                                                                                         |                                        |            |
| Region 496.1 | T1PKS                       | 4,600  | 51,229 | F9775A/F9775B/orsellinic acid                                                                                                           | Polyketide:iterative type I polyketide | 50%        |
| Region 565.1 | T1PKS  NRPS                 | 1      | 17,795 |                                                                                                                                         |                                        |            |
| Region 660.1 | T1PKS                       | 19,241 | 69,157 |                                                                                                                                         |                                        |            |
| Region 675.1 | terpene                     | 1      | 11,769 |                                                                                                                                         |                                        |            |
| Region 700.1 | T1PKS                       | 1      | 4,839  |                                                                                                                                         |                                        |            |
| Region 714.1 | T1PKS                       | 1      | 27,887 | monacolin K                                                                                                                             | Polyketide                             | 22%        |
| Region 750.1 | NRPS                        | 1      | 33,830 |                                                                                                                                         |                                        |            |
| Region 935.1 | terpene                     | 22,244 | 43,568 |                                                                                                                                         |                                        |            |
| Region 940.1 | T1PKS                       | 1      | 25,739 | 1,3,6,8-tetrahydroxynaphthalene                                                                                                         | Polyketide                             | 100%       |
| Region 959.1 | NRPS-like                   | 1      | 18,201 |                                                                                                                                         |                                        |            |
| Region 969.1 | NRPS-like                   | 6,042  | 35,863 |                                                                                                                                         |                                        |            |

**Figure S15.** Identified secondary metabolites regions in the genome of the strain F-4518.

| Region       | Type             | From   | To     | Most similar known cluster                                                          | Similarity         |
|--------------|------------------|--------|--------|-------------------------------------------------------------------------------------|--------------------|
| Region 95.1  | NRPS             | 1      | 18,276 |                                                                                     |                    |
| Region 122.1 | NRPS             | 15,703 | 49,305 |                                                                                     |                    |
| Region 183.1 | T1PKS            | 1      | 43,063 | azanigerone A/azanigerone B/azanigerone C/azanigerone D/azanigerone E/azanigerone F | Polyketide 20%     |
| Region 224.1 | T1PKS            | 1      | 19,551 |                                                                                     |                    |
| Region 295.1 | NRPS             | 1      | 14,105 |                                                                                     |                    |
| Region 342.1 | T1PKS            | 1      | 18,121 | scytalone/T3HN                                                                      | Polyketide 40%     |
| Region 384.1 | NRPS-like        | 35,666 | 61,986 | choline                                                                             | NRP 100%           |
| Region 430.1 | T1PKS            | 1      | 22,692 |                                                                                     |                    |
| Region 446.1 | fungal-RIPP-like | 1      | 22,491 |                                                                                     |                    |
| Region 587.1 | NRPS             | 1      | 3,851  |                                                                                     |                    |
| Region 794.1 | T1PKS            | 1      | 8,518  |                                                                                     |                    |
| Region 813.1 | NRPS             | 1      | 29,183 |                                                                                     |                    |
| Region 850.1 | T1PKS            | 1      | 20,490 |                                                                                     |                    |
| Region 892.1 | fungal-RIPP-like | 1      | 51,717 |                                                                                     |                    |
| Region 914.1 | T1PKS  , NRPS    | 1      | 32,243 | phyllostictine A/phyllostictine B                                                   | NRP+Polyketide 20% |
| Region 960.1 | NRPS  , T1PKS    | 1      | 23,427 | phomacin D/phomacin E                                                               | Polyketide+NRP 22% |
| Region 966.1 | T1PKS            | 1      | 23,695 |                                                                                     |                    |

**Figure S16.** Identified secondary metabolites regions in the genome of the strain F-4519.
